# Supplementary material
Source: PubMed Central journal article supplement (PMC7878430)
Supplement: NIHMS1654880-supplement-1.pdf [file NIHMS1654880-supplement-1.pdf]

Figure S1

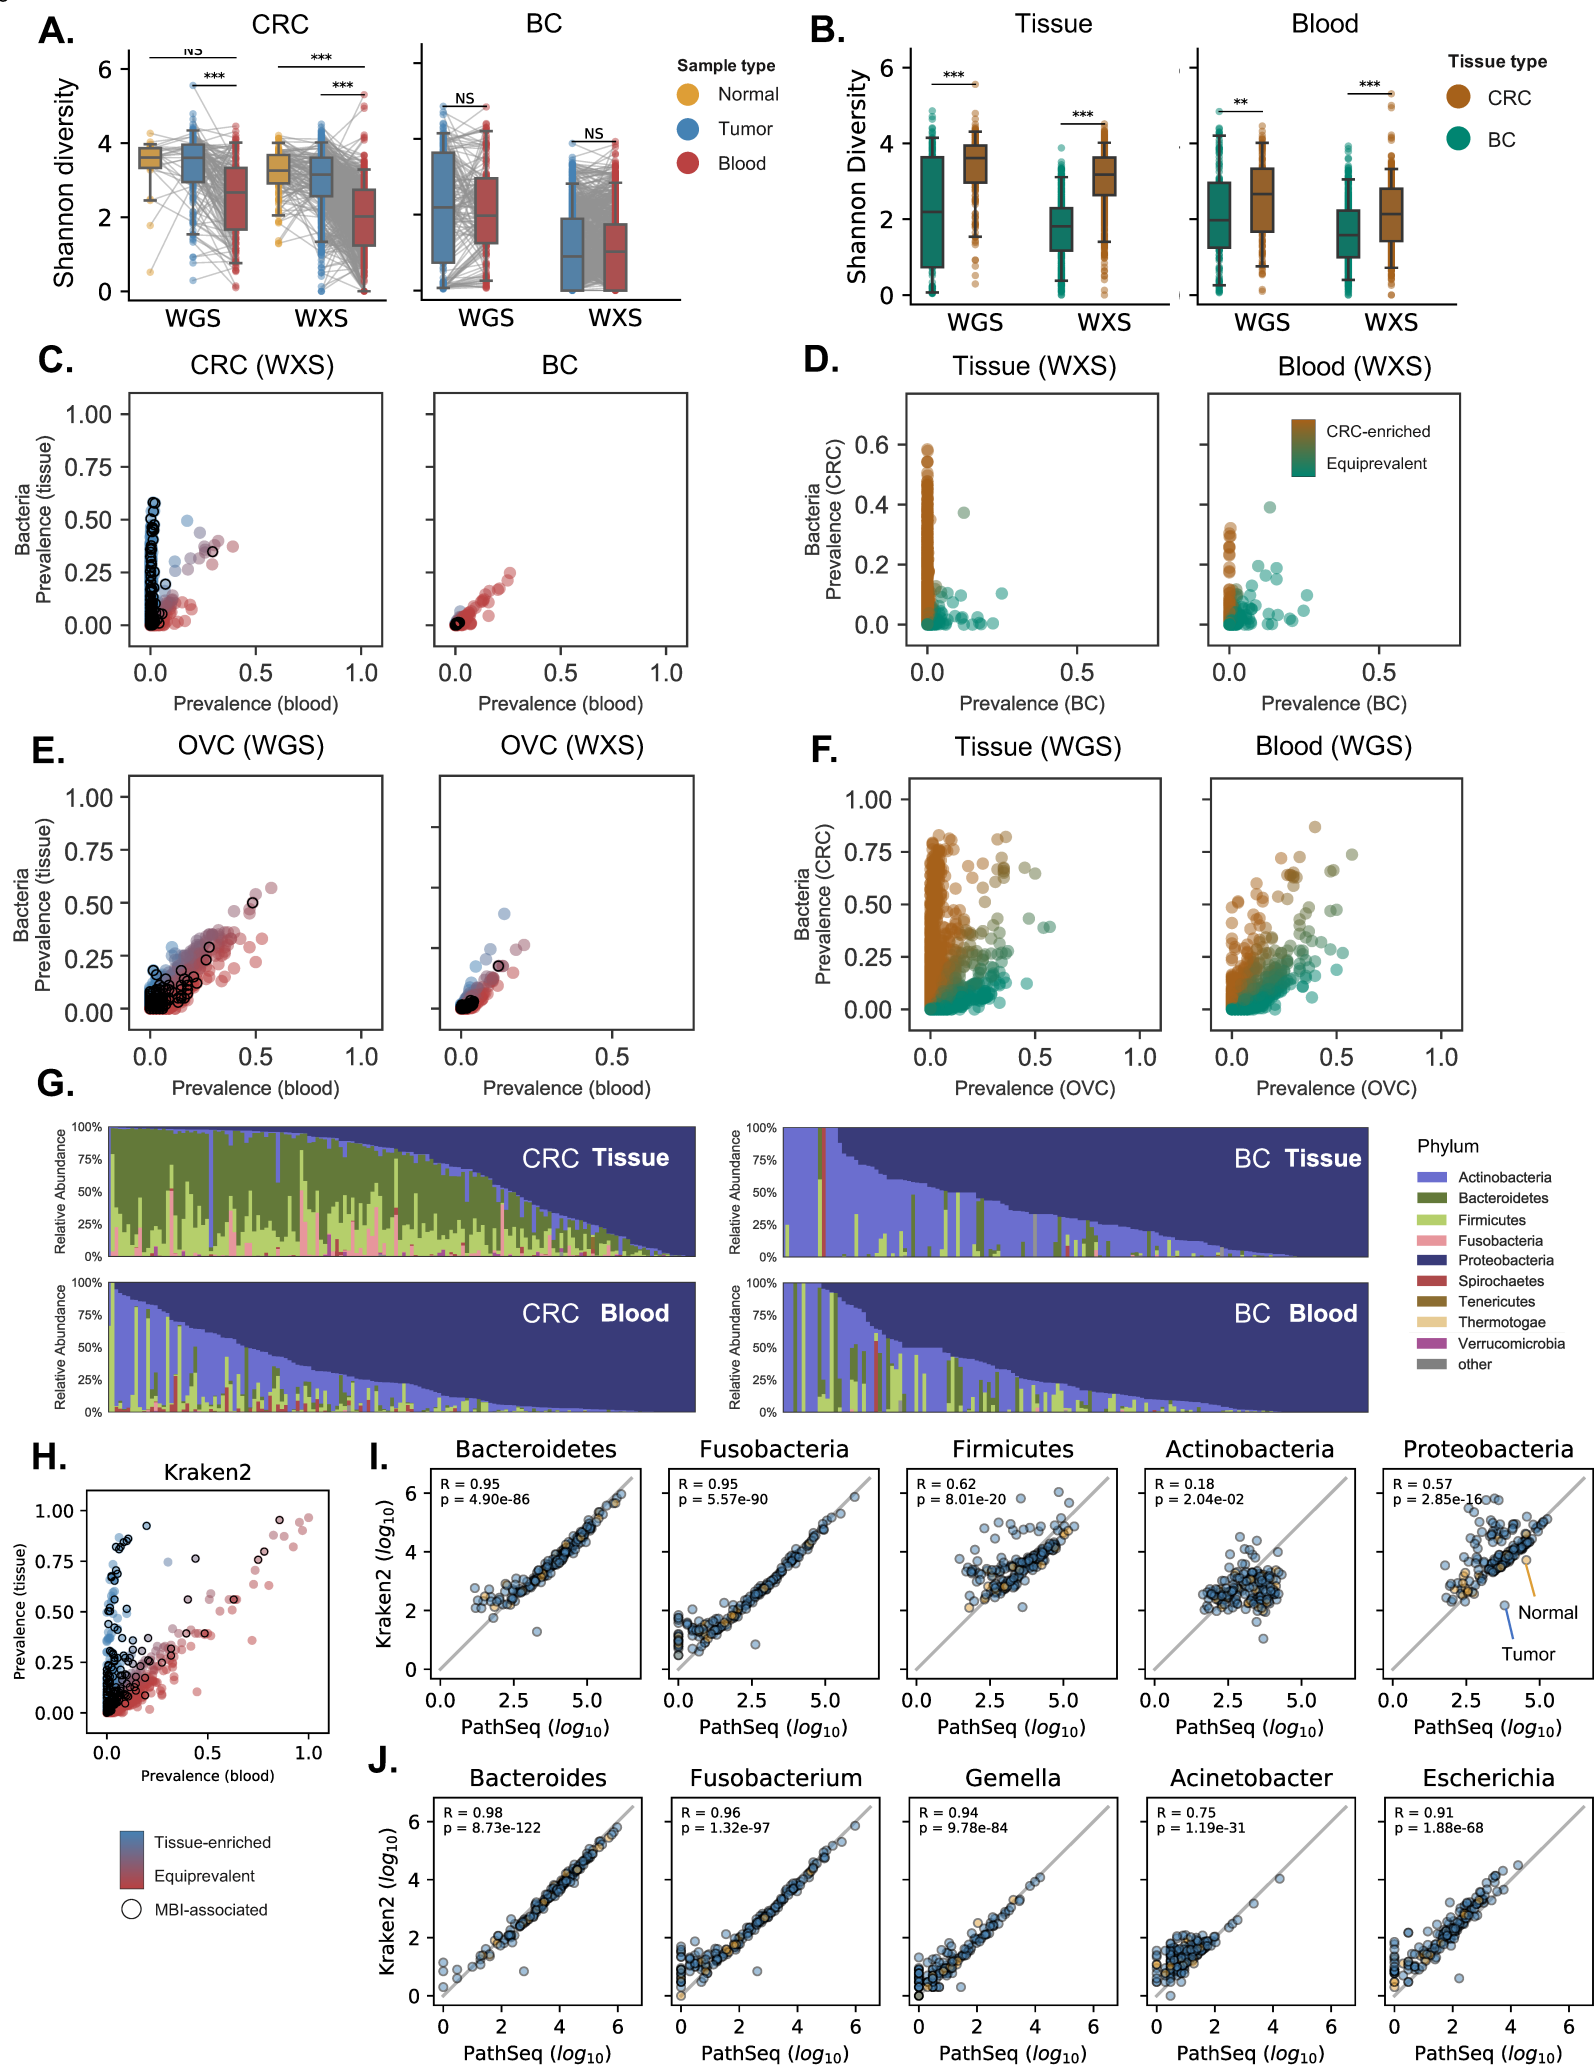

Figure S2

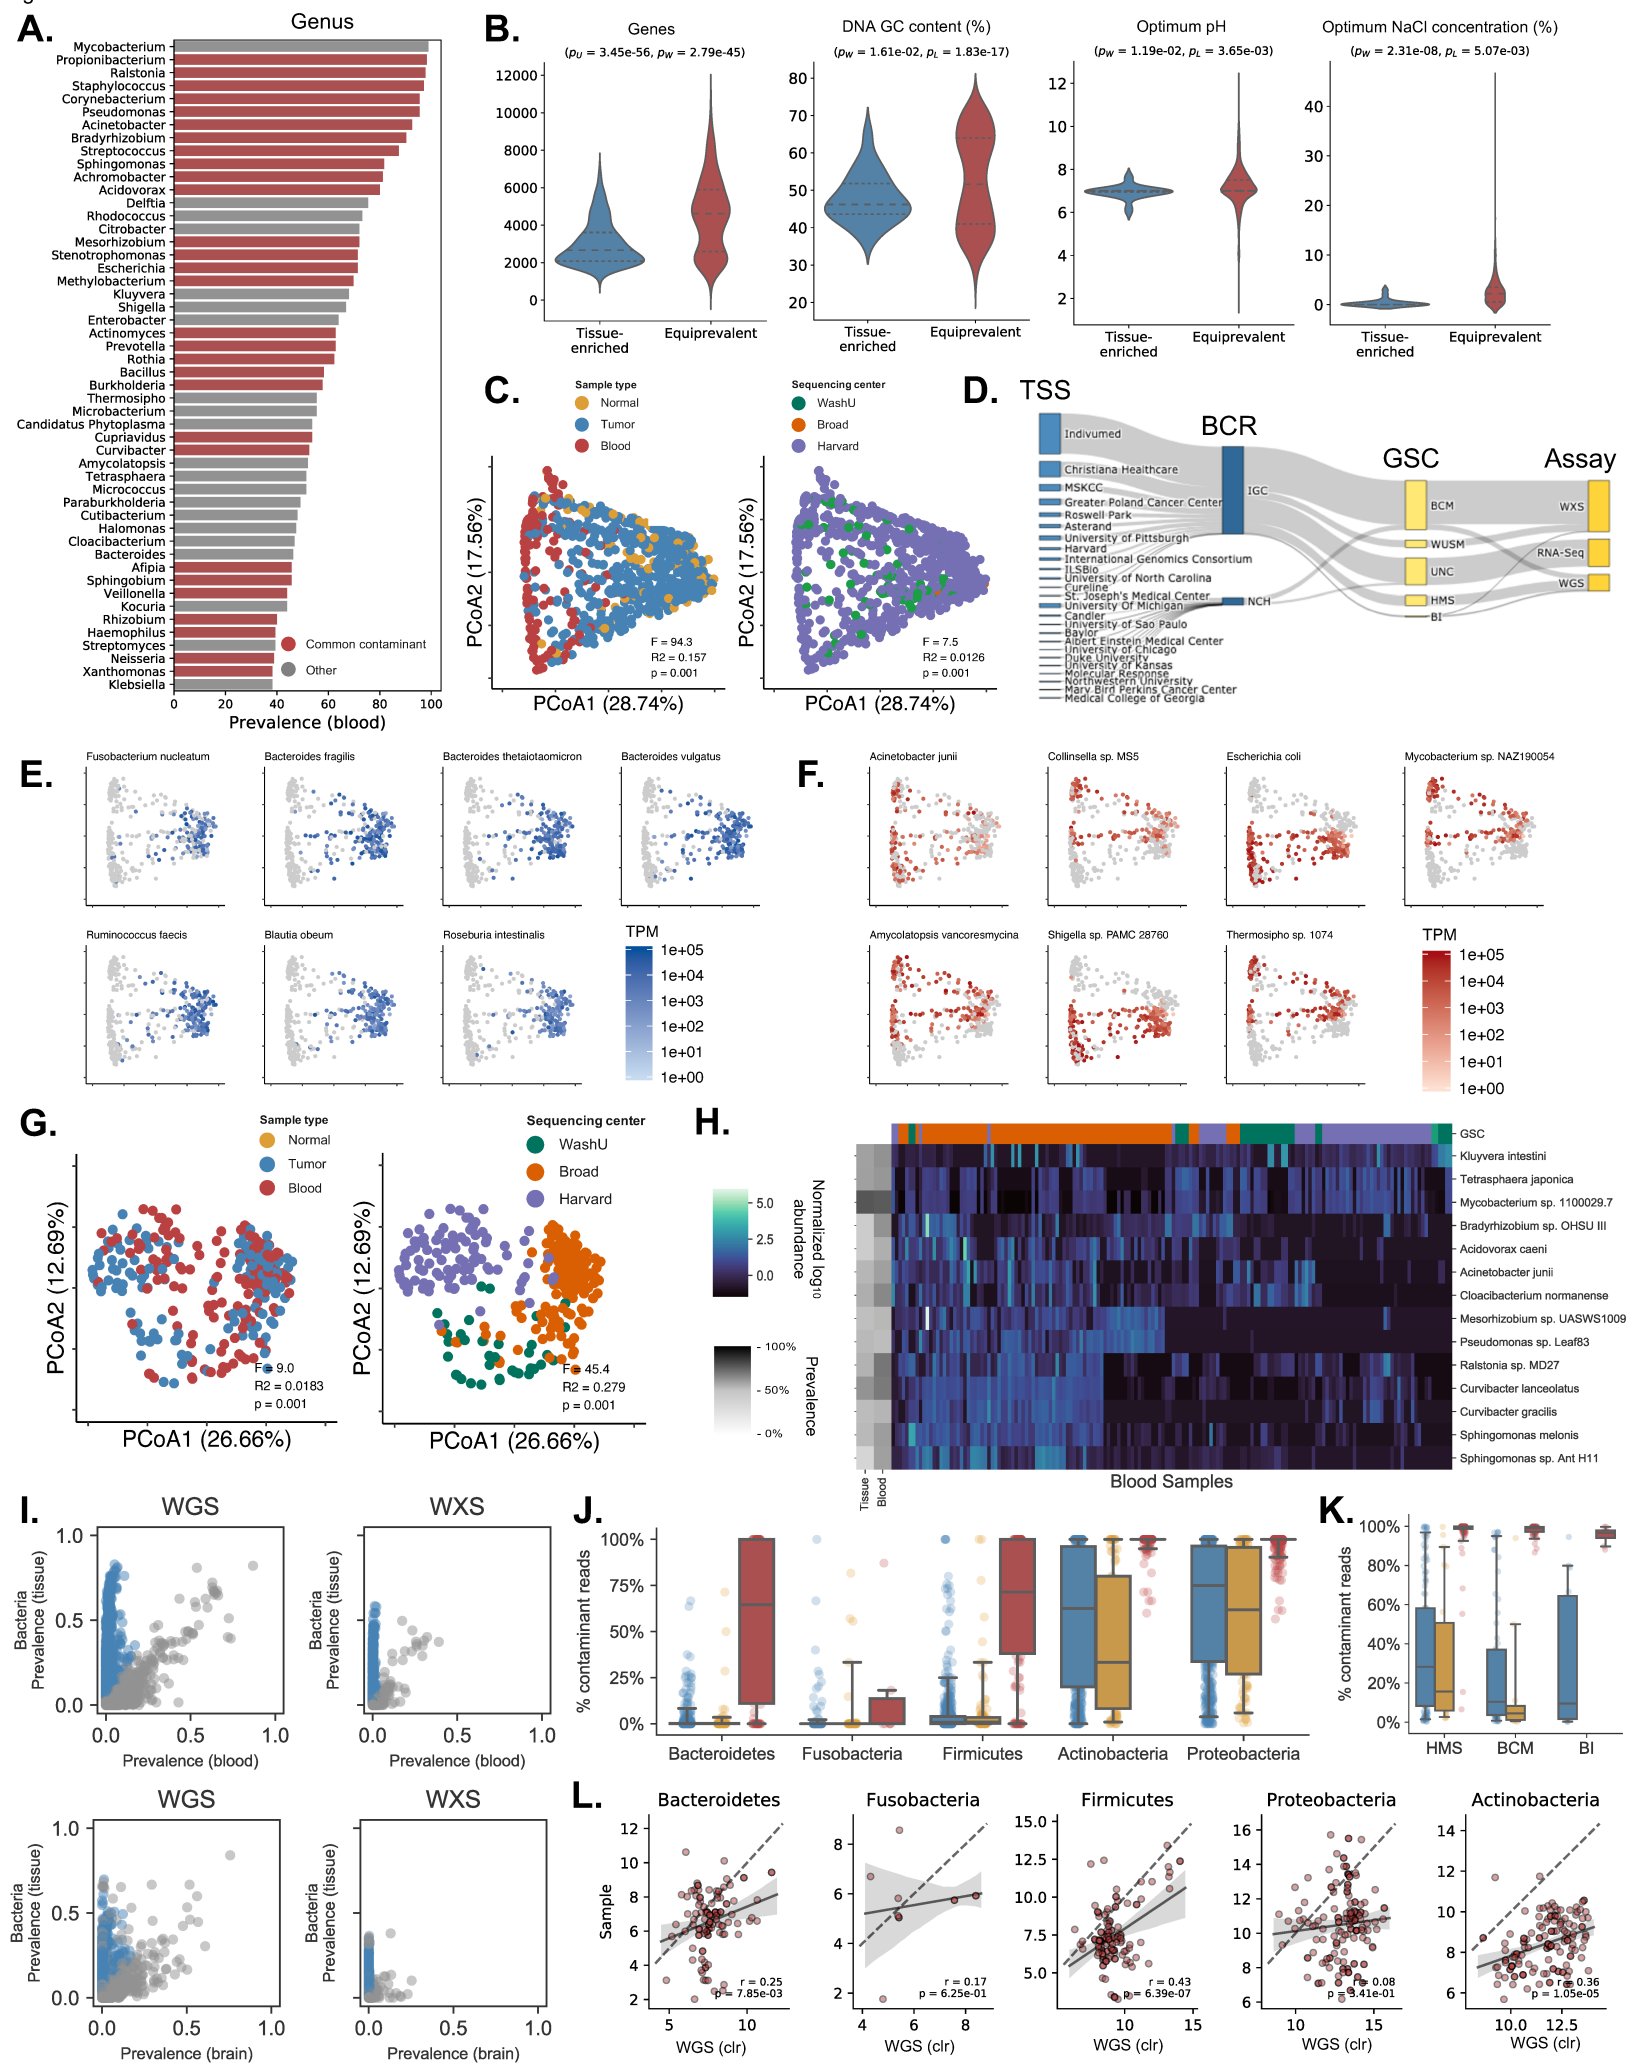

Figure S3

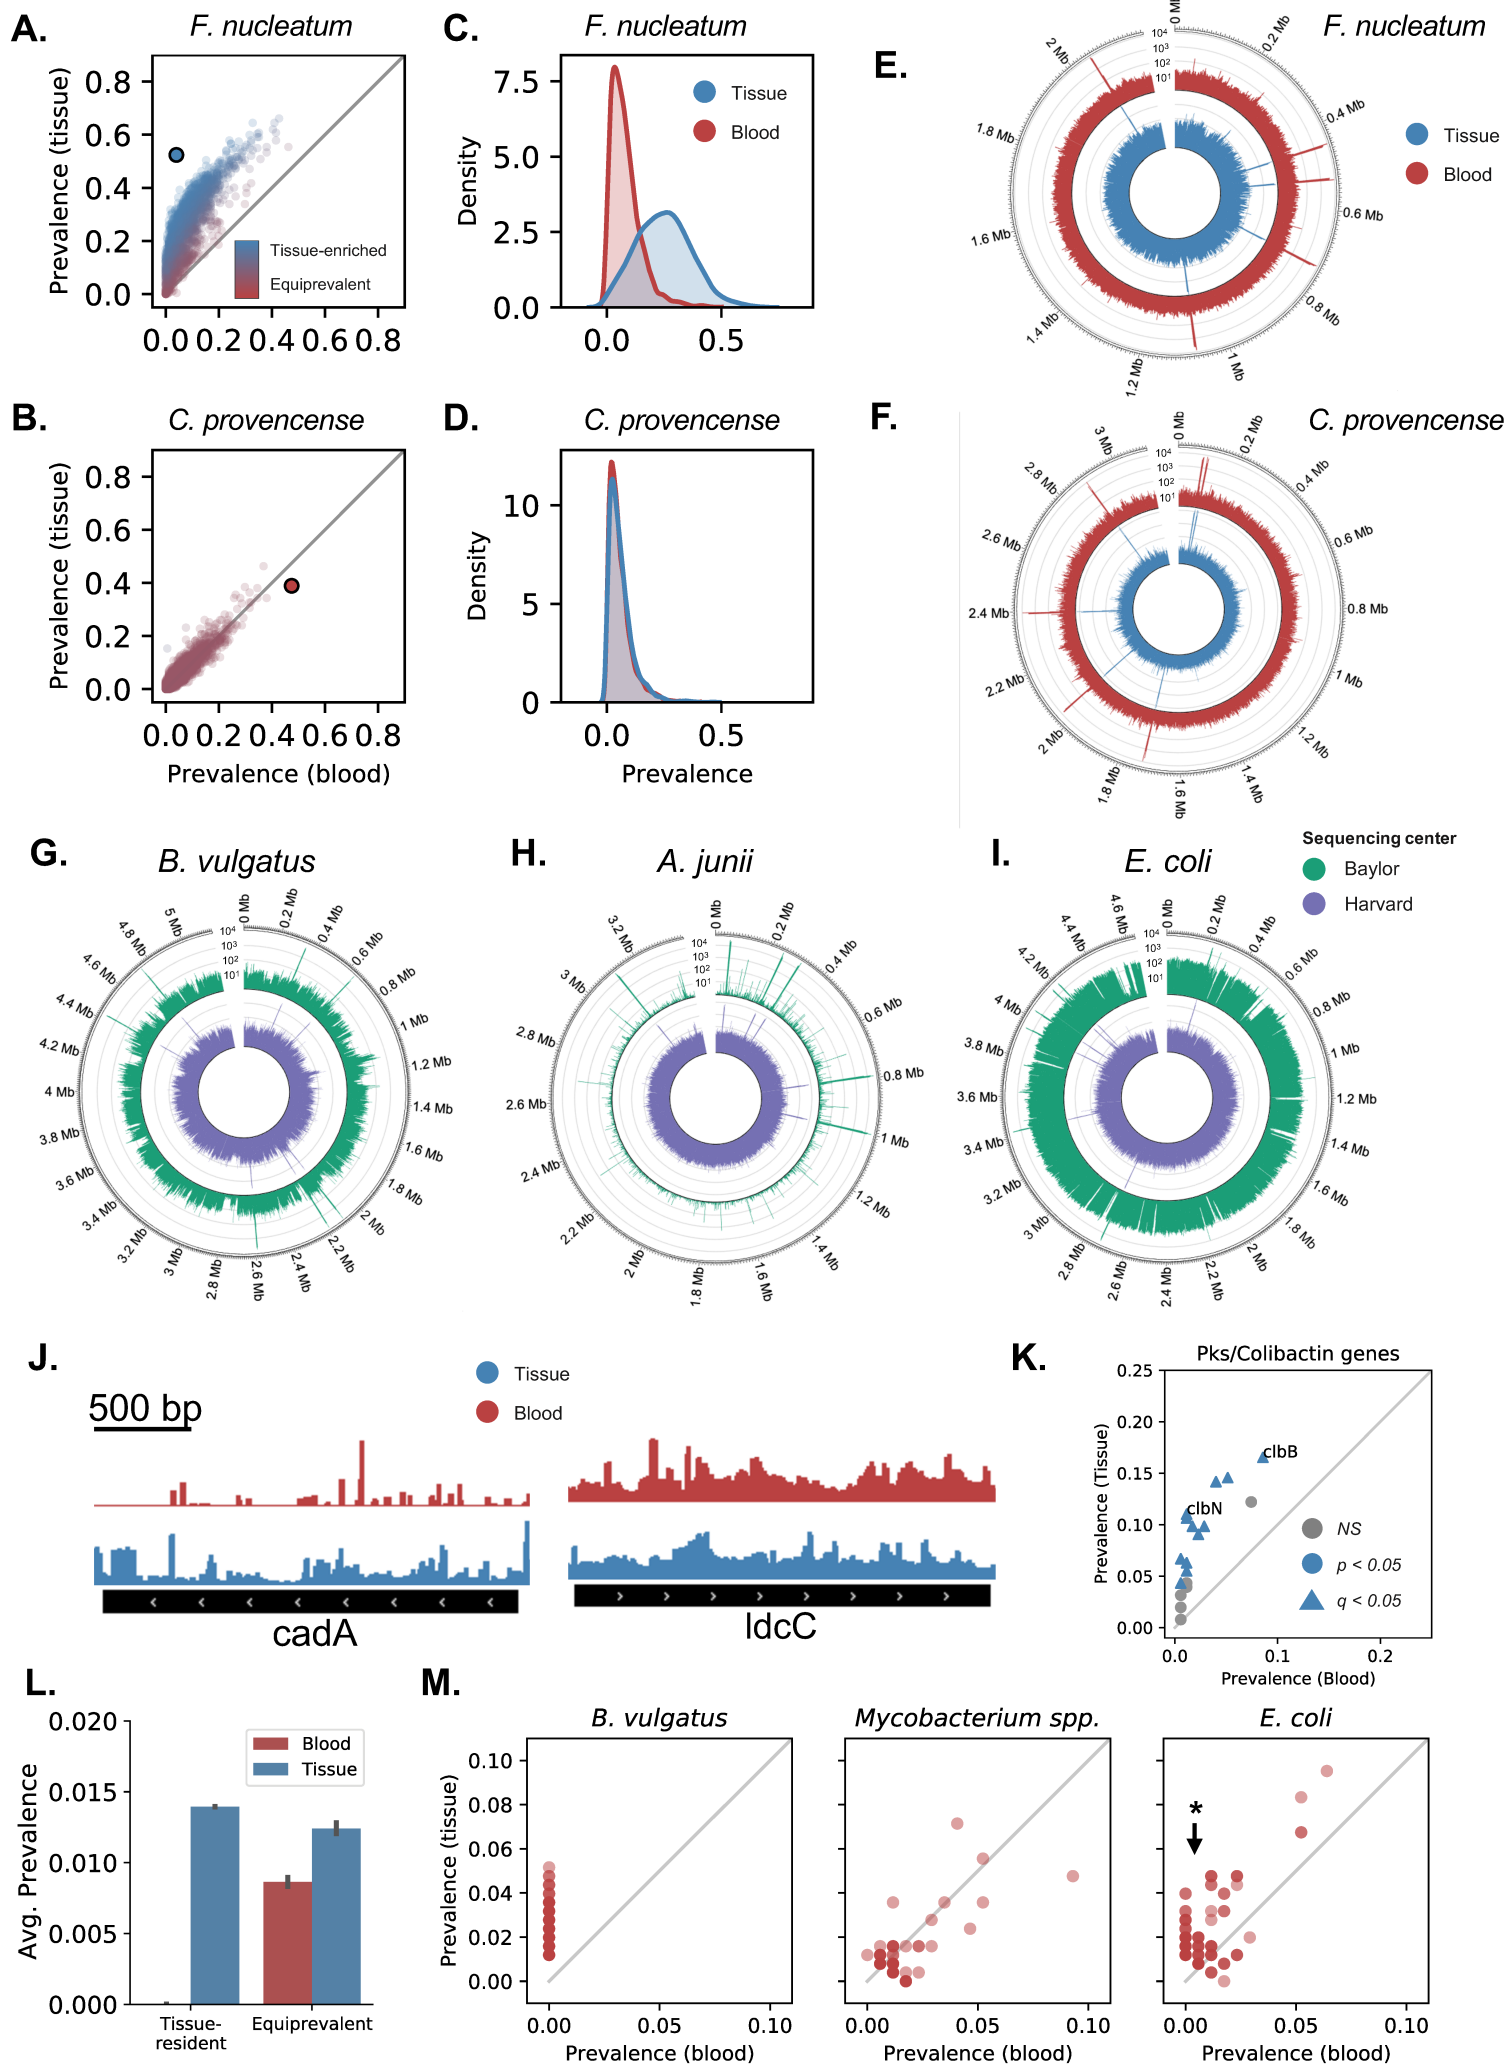

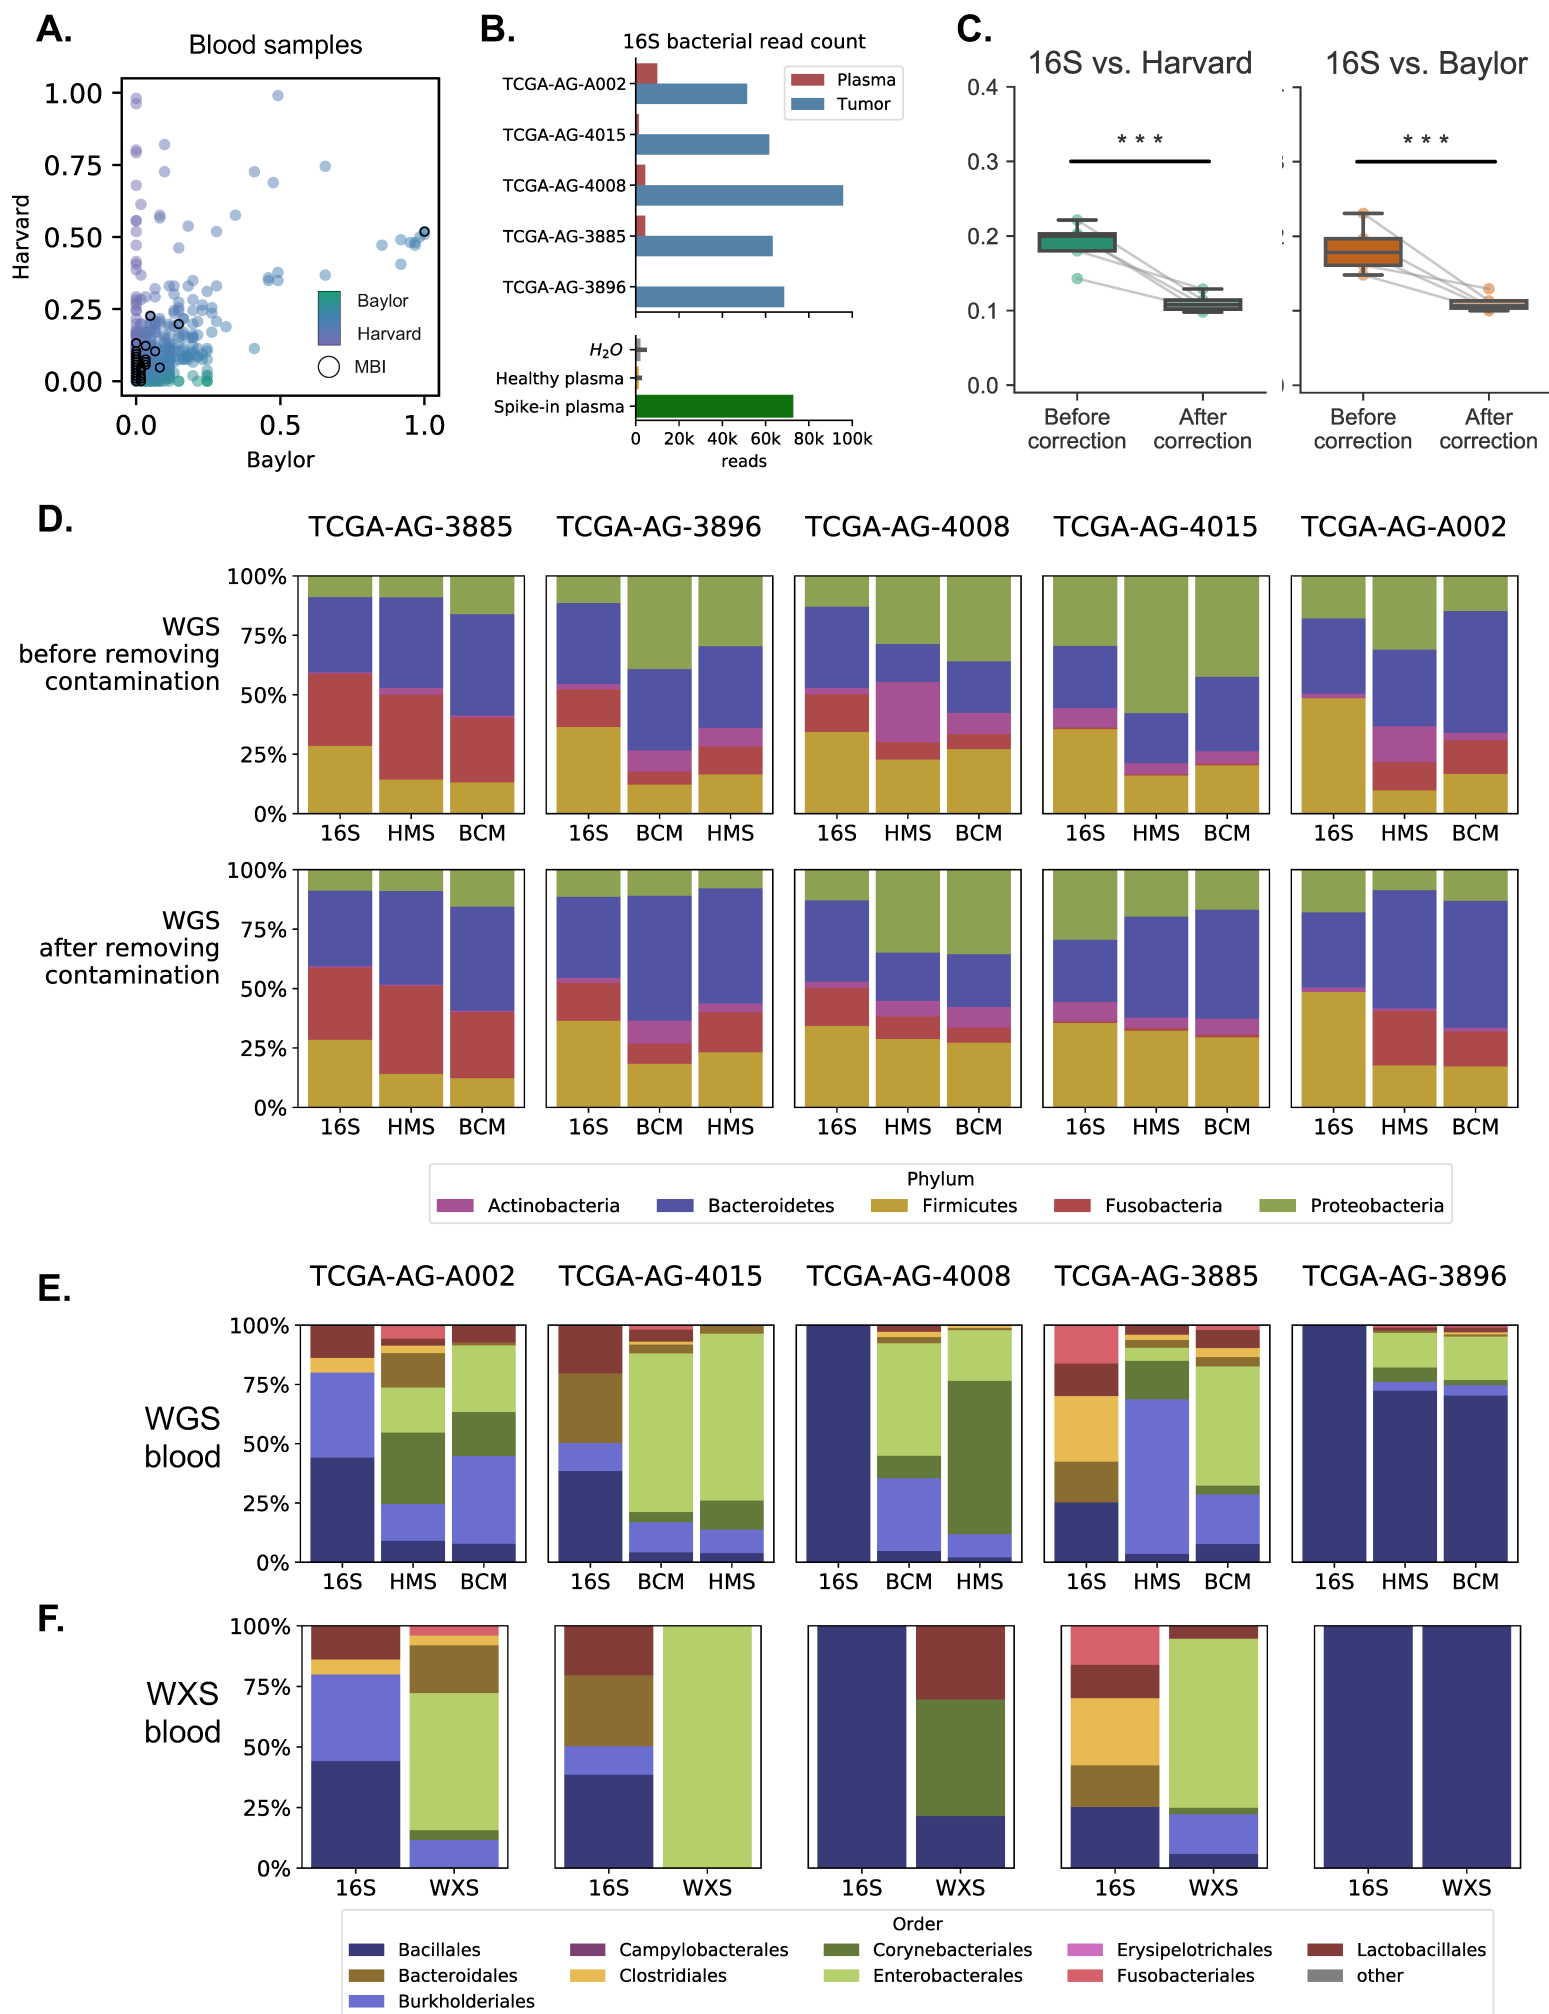



**Figure S5**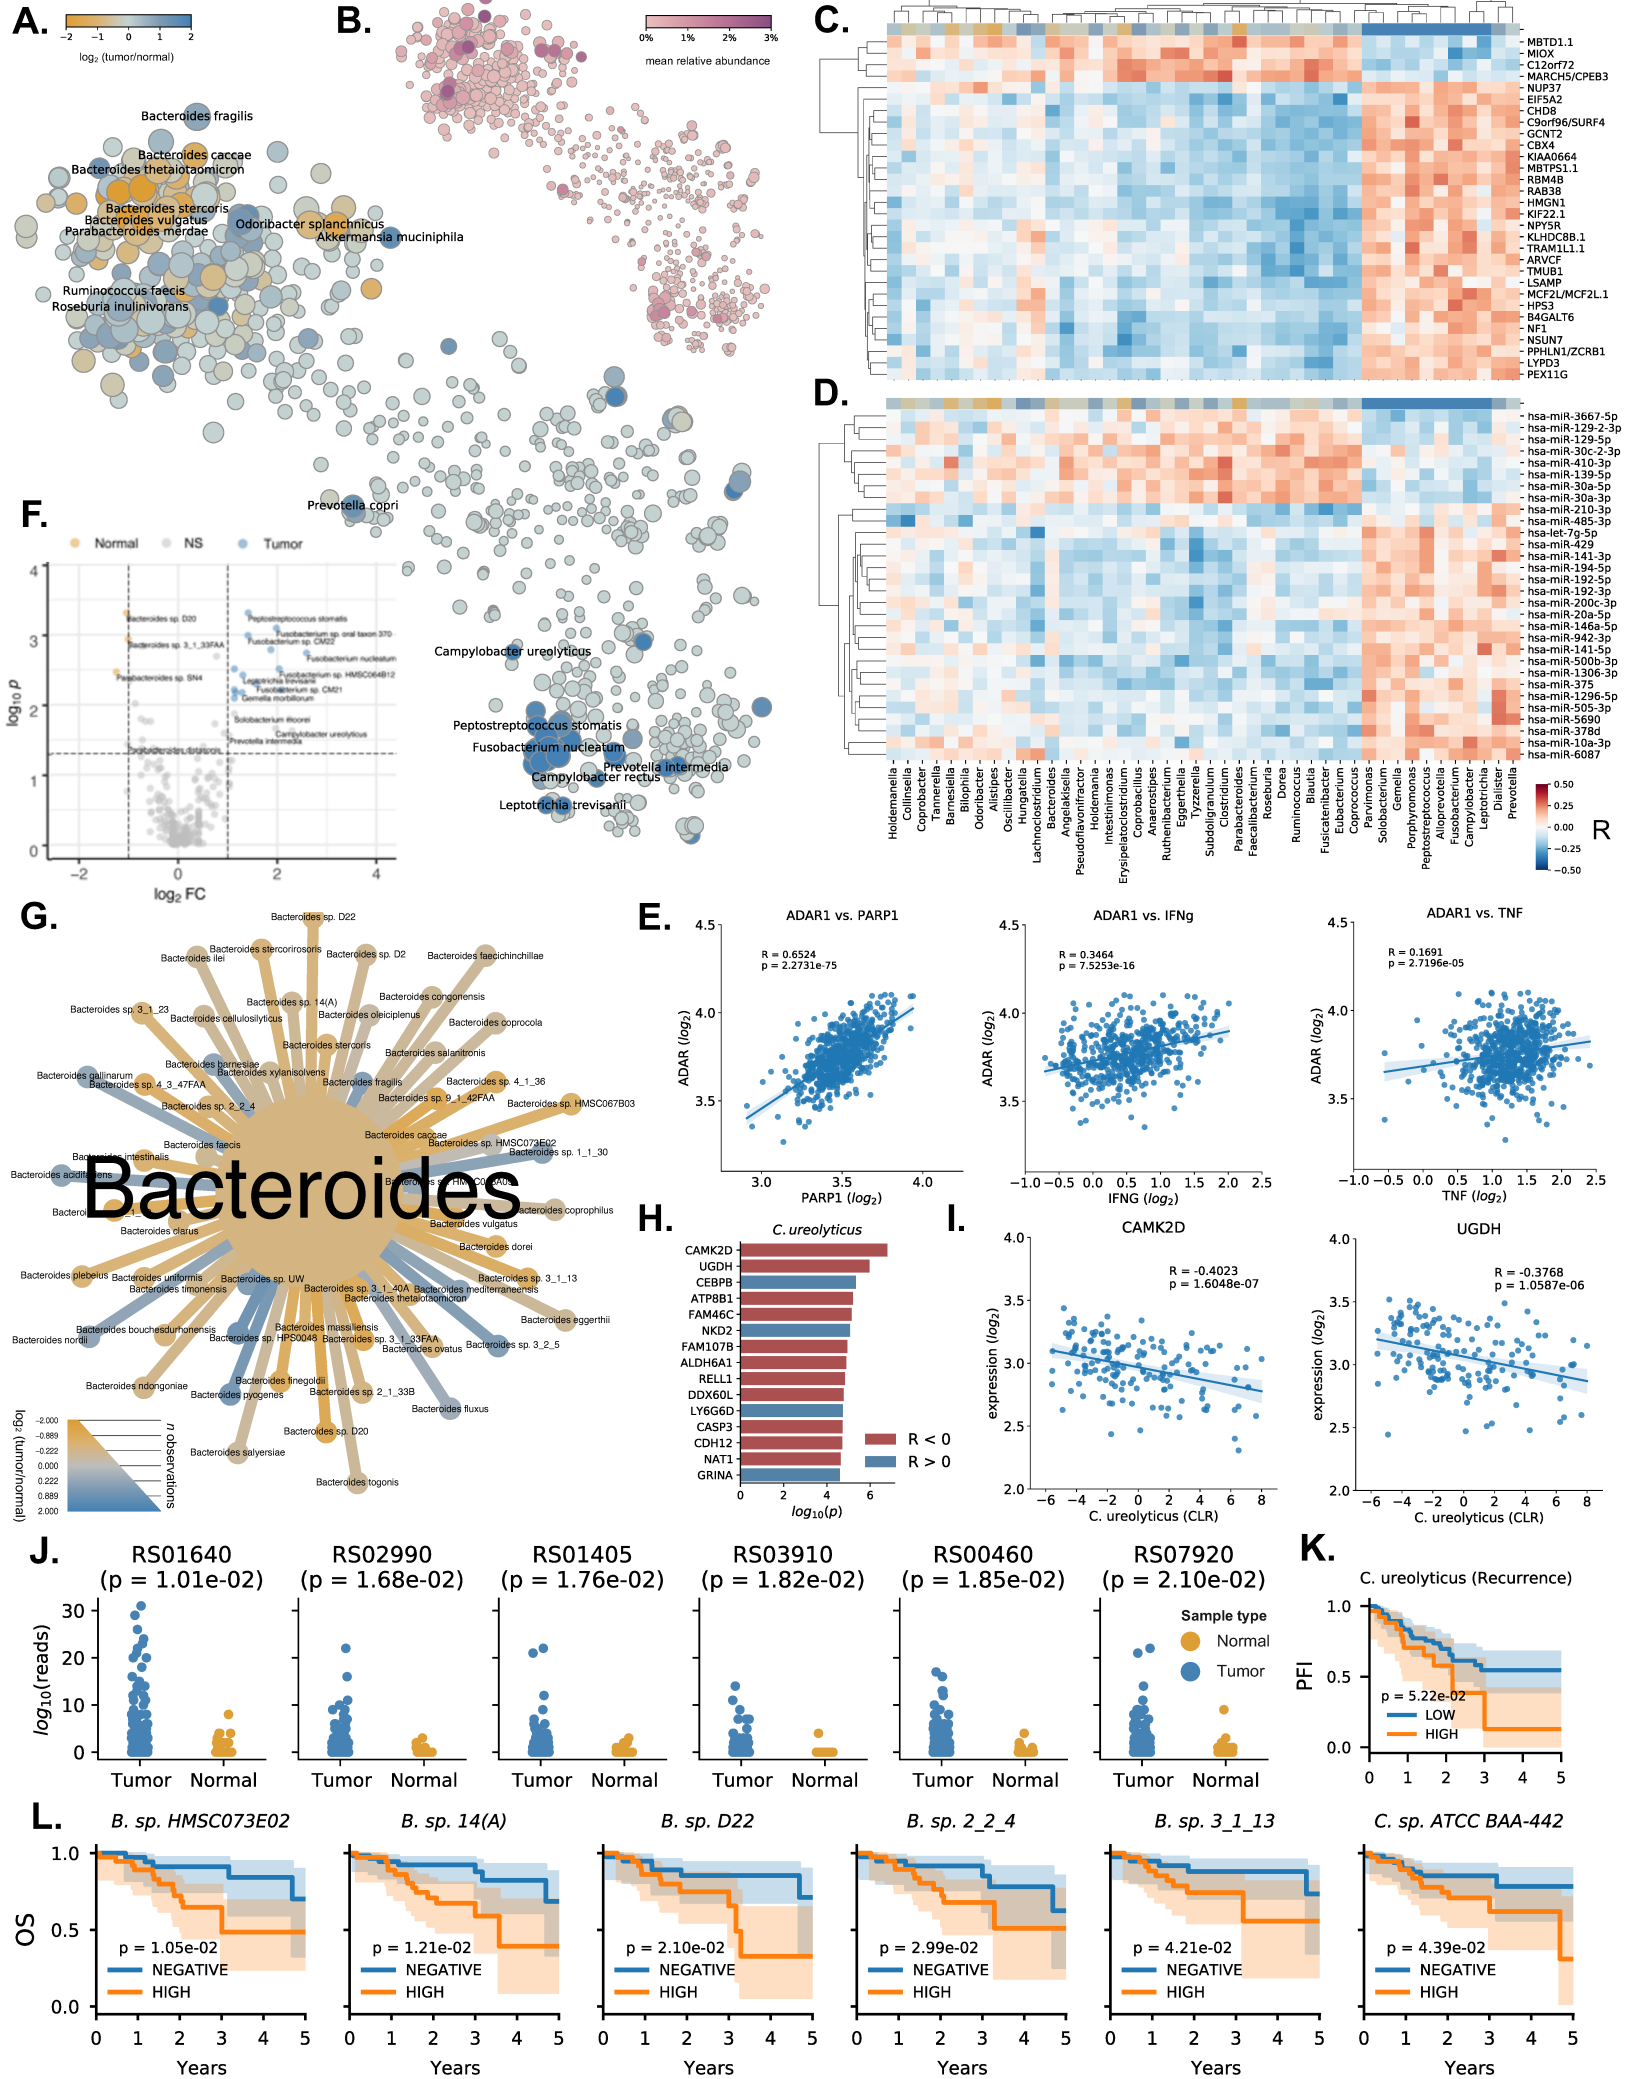

A.

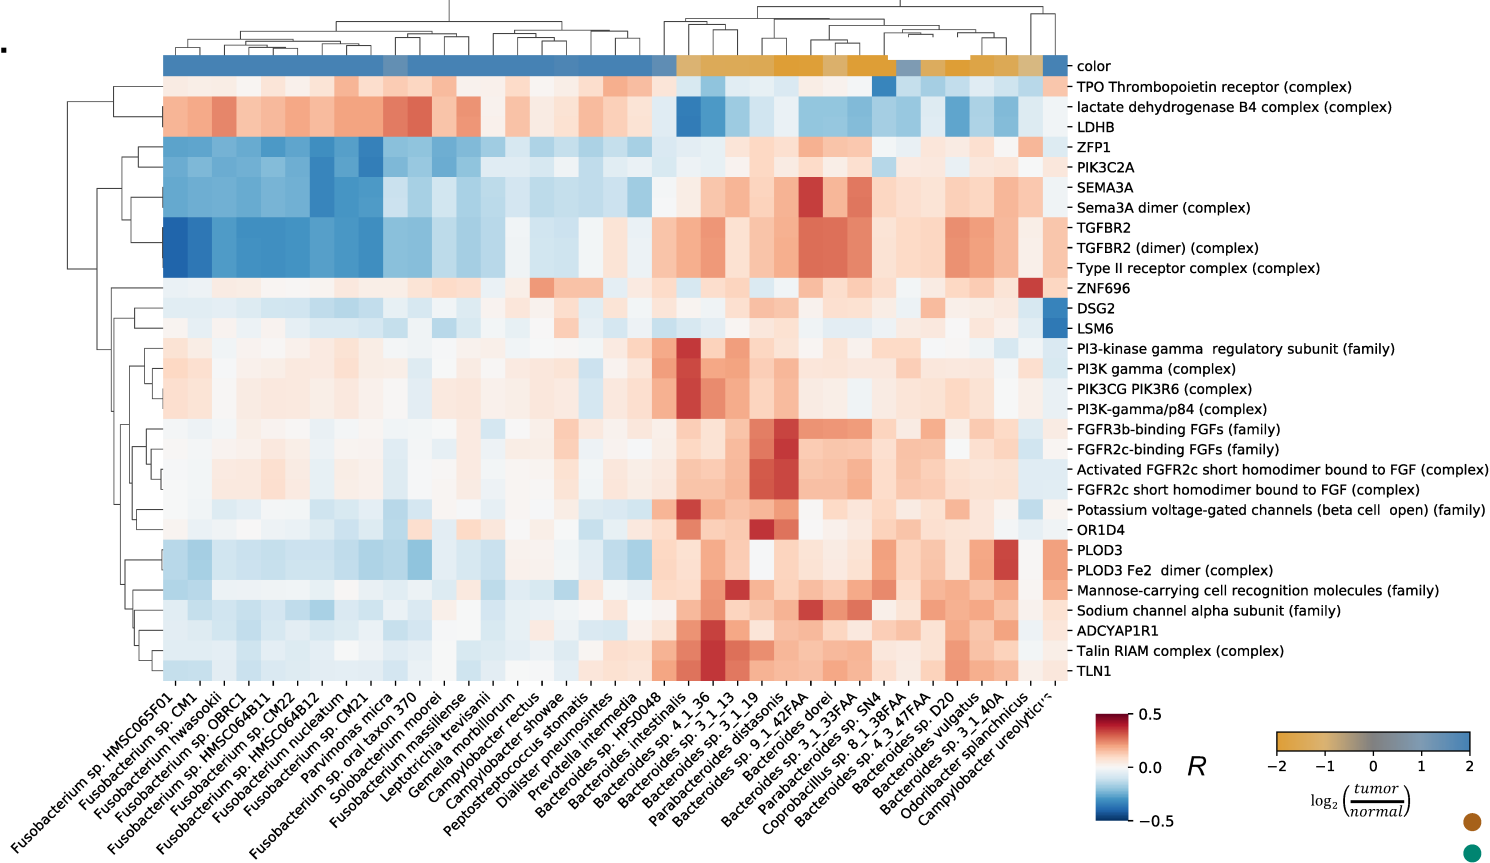

B.

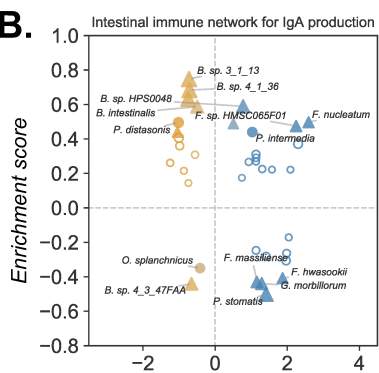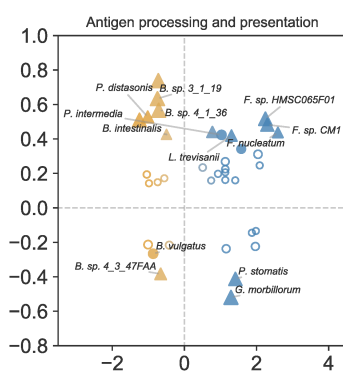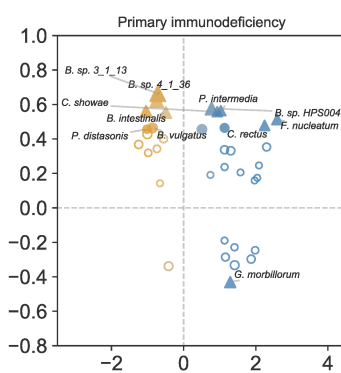

C.

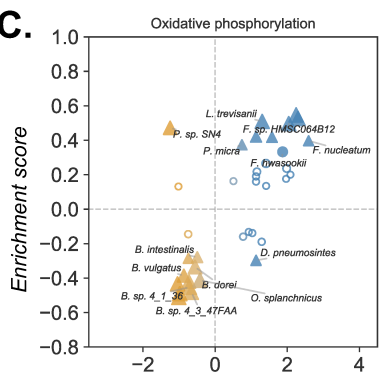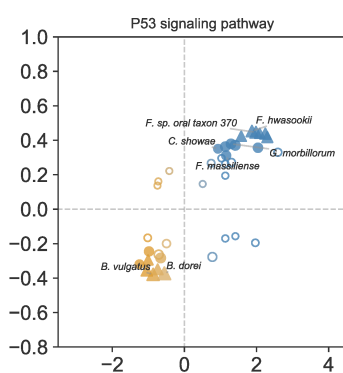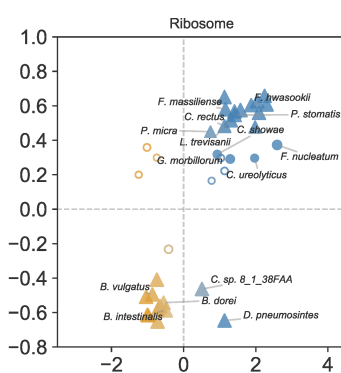

D.

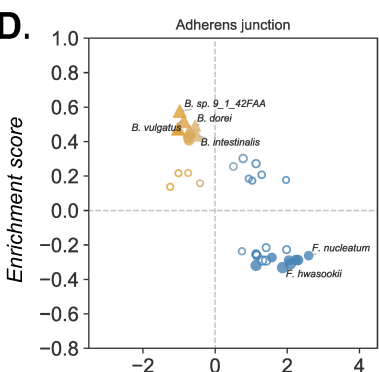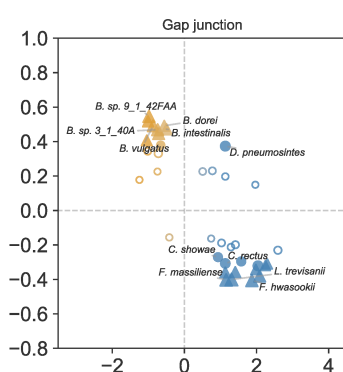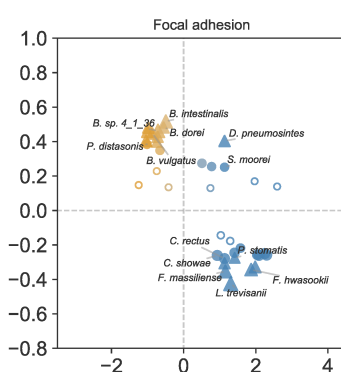

E.

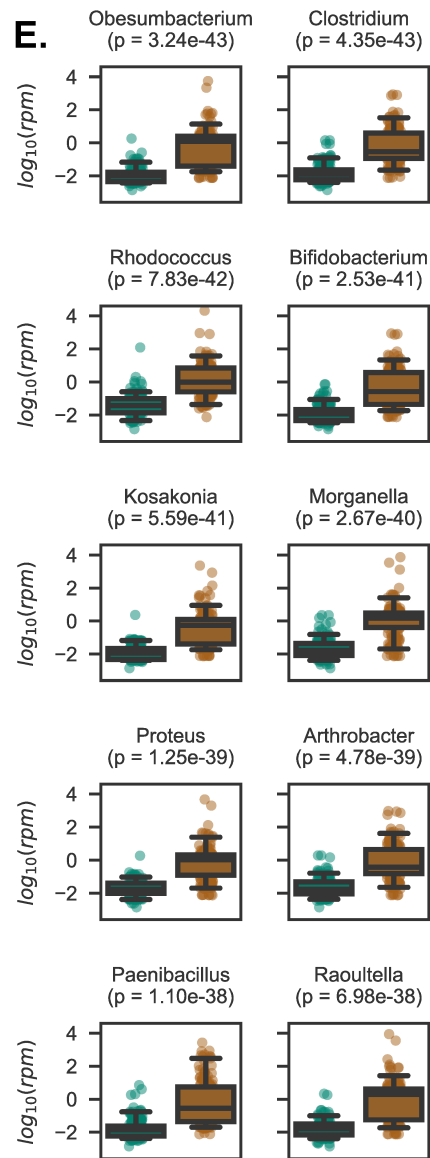

Figure S7

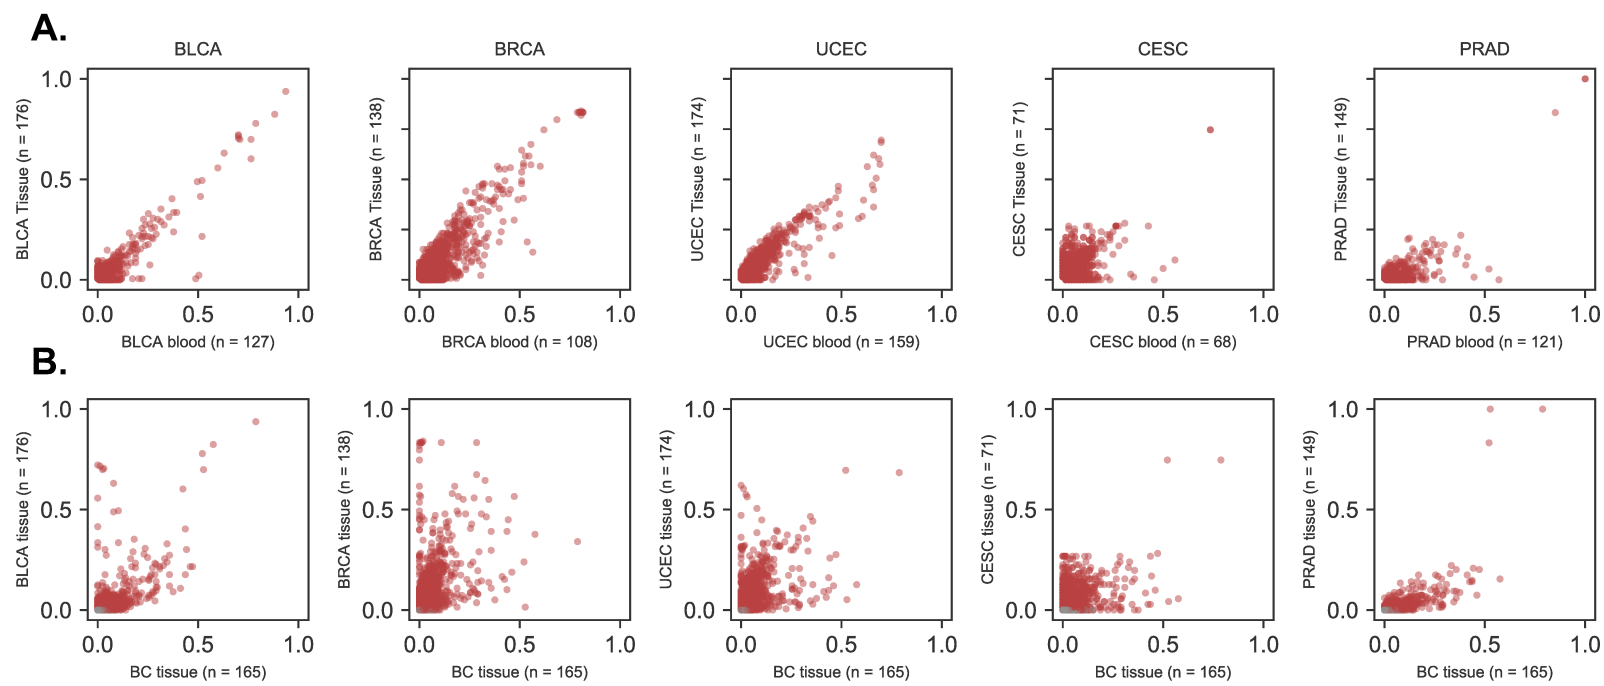

## SUPPLEMENTAL FIGURE LEGENDS

### Figure S1. WGS and WXS harbor colorectal bacterial reads distinct from blood and brain, Related to Figure 1

- (A) Matched analysis of Shannon diversity of bacteria in normal tissue (yellow), tumor tissue (blue), and blood (red) from CRC and BC patients in TCGA. By a paired, one-sided *t*-test, tumor and normal tissue from CRC patients have more bacterial diversity than CRC blood, but BC tumor tissue does not have more bacterial diversity than BC blood.
- (B) Shows diversity data from (A), but pools together tumor and normal tissue samples from BC (green) and CRC (brown) patients. By an unpaired, one-sided *t*-test CRC tissue has greater bacterial diversity than BC tissue, and CRC blood has greater bacterial diversity than BC blood.
- (C) Comparison of bacterial species prevalence in WXS data for blood and tissue samples from CRC and BC.
- (D) Comparison of bacterial species prevalence in WXS data for BC and CRC samples from tissue and blood.
- (E) Comparison of bacterial species prevalence in WGS and WXS data for blood and tissue samples from OVC.
- (F) Comparison of bacterial species prevalence in WGS data for OVC and CRC samples from tissue and blood.
- (G) Relative abundance of bacterial phyla in WXS data for tissue and blood samples from CRC and BC patients.
- (H) Comparison of bacterial species prevalence in tissue and blood using Kraken2 results.
- (C – D) Correlation between PathSeq and Kraken2 read counts estimated for selected phyla (I) and genera (J) in matched sequencing experiments from tumors (blue) and normal tissue (yellow).

### Figure S2. Most equiprevalent taxa are common contaminants and are associated with particular sequencing centers, Related to Figure 2

- (A) Genera ranked by their prevalence in CRC blood samples. Common contaminants are marked in red.
- (B) Panel comparing gene count, G-C content, pH optima, and NaCl optima for tissue-enriched (blue) and equiprevalent (red) species. Dashed lines represent median and quartiles.
- (C) PCoA of WXS data for CRC samples, labeled by sample type (left) and sequencing center (right).
- (D) Schematic showing the path of TCGA sequencing samples from their tissue source site (TSS) to their genome characterization centers (GSC) for sequencing by various platforms.
- (E) Abundance of selected tissue-resident species overlaid on PCoA plot of WGS sequencing data (Figure 2D).
- (F) Abundance of putative contaminant species overlaid on PCoA plot of WGS sequencing data (Figure 2D).
- (G) PCoA of WGS data for BC samples, labeled by sample type (top) and sequencing center (bottom).
- (H) Heatmap clustering of bacterial species' normalized  $\log_{10}$ -abundance in blood samples from BC patients.
- (I) Species classified as tissue-resident by comparing WGS prevalence in tissue and blood samples (blue) are consistent with prevalence comparisons of BC tissue vs. CRC tissue and for analogous comparisons made with WXS data.
- (J) Fraction of contaminant bacterial reads from WXS data for normal (yellow), tumor (blue), and blood (red) samples from CRC patients, broken down by the five most prevalent phyla.
- (K) Fraction of contaminant bacterial reads from WGS data for each sample type at Harvard, Baylor, and Broad.
- (L) The CLR-normalized relative abundances of the five most prevalent phyla are uncorrelated between matched WGS and WXS blood samples. Dashed lines represent

**Figure S3. Detecting tissue-resident and contaminant species with gene-level resolution, Related to Figure 3**

- (A) Prevalence of genes belonging to *F. nucleatum* genes in blood vs. tissue; representative of tissue-resident species. The large blue dot indicates species-level prevalence.



- (B) Prevalence of genes belonging to *C. provencense* genes in blood vs. tissue; representative of contaminant species. The large red dot indicates species-level prevalence.
- (C – D) Distribution of gene prevalence in blood (red) and tissue (blue) for *F. nucleatum* (C) and *C. provencense* (D).
- (E – F) Genome coverage of reads aligning to *F. nucleatum* (E) and *C. provencense* (F) in blood (red) and tissue (blue).
- (G – I) Genome coverage of *B. vulgatus* (G), *A. junii* (H), *E. coli* (I) in samples from Baylor and Harvard.
- (J) Distribution of sequencing reads aligned to *cadA* (left) and *ldcC* (right) genes in blood (red) and tissue (blue).
- (K) Prevalence of genes in the *pks* island encoding colibactin in tissue and blood samples. These genes are enriched in tissue from CRC patients, consistent with previous reports.
- (L) Barplot showing average prevalence of variants from species defined as tissue-resident and equiprevalent species in blood (red) and tissue (blue). Data are represented as mean  $\pm$  95% CI.
- (M) Prevalence of nucleotide variants in selected tissue-resident (*B. vulgatus*), contaminant (*Mycobacterium spp.*), and mixed-evidence species (*E. coli*). *E. coli* appears to harbor both tissue-enriched and equiprevalent sequencing variants.

\* Denotes tissue-resident variants.

**Figure S4. Metagenomic analysis of original TCGA tissue and blood samples validate tissue-resident microbial compositions and equivalent species as contaminants, Related to Figure 4**

- (A) Prevalence of species in blood samples sequenced at Baylor vs. Harvard.
- (B) Total bacterial reads from 16S results of tissue (blue), plasma (red) and controls (bottom panel). Data are represented as mean  $\pm$  95% CI.
- (C) Weighted UniFrac distances between microbial compositions of tissue sequenced at Harvard and Baylor (WGS) compared with patient-matched tissue analyzed at Duke (16S), before and after correcting for contamination.

- (D) Relative abundances of bacterial phyla in 16S results for tissue compared with tissue samples sequenced using WGS at Harvard and Baylor.
- (E – F) Relative abundances of bacterial phyla in 16S results for blood compared with blood samples sequenced using WGS at Harvard and Baylor (E) and WXS (F).

**Figure S5. Analysis of microbe-microbe associations in contamination-adjusted data yields clinically relevant bacterial coabundance groups, Related to Figure 5**

- (A) T-distributed stochastic neighborhood embedding (T-SNE) visualization showing coabundance of tumor-associated (blue) and normal tissue-associated (yellow) species. Points are sized proportional to the species' prevalence in tissue.
- (B) T-SNE visualization showing coabundance of detected species and their relative abundances (purple). Points are sized according to the species prevalence in tissue.
- (C) Coabundance groups are predictive of gene methylation (Methylation 27K).
- (D) Coabundance groups are predictive of micro-RNA expression (miRNA-seq).
- (E) ADAR1, which distinguished of *Fusobacterium* and *Bacteroides* coabundance groups, is positively correlated with PARP1, IFN-gamma, and TNF-alpha.
- (F) Volcano plot showing species that are more abundant in tumor samples (blue) or matched normal tissue (yellow).
- (G) Heat-tree showing *Bacteroides spp.* and their associations with normal (yellow) and tumor (blue) tissue.
- (H) Barplot showing genes significantly correlated with *C. ureolyticus* expression in tissue samples from CRC patients.
- (I) Scatterplots showing correlation of *C. ureolyticus* abundance (CLR) and gene expression of CAMK2D and UGDH.
- (J) Several in the *C. ureolyticus* genome are significantly associated with tumor samples (blue) relative to adjacent normal tissue (yellow).
- (K) *C. ureolyticus* is predictive of progression-free interval (PFI) among among patients with CRC recurrence.

- (L) Several species in the *Bacteroides* cluster are negatively predictive of patient survival (OS).

**Figure S6. Bacteria in TCGA sequencing data are prognostic of mucosal barrier injury, immune infiltration, and tumor staging, Related to Figure 6**

- (A) Heatmap showing correlations between CLR-transformed abundances of tumor- and normal tissue-associated species with features in the PARADIGM pathway matrix. PARADIGM scores are inferred from gene expression data.
- (B – D) Comparison of differentially abundant species and their association with tissue type (x-axis) versus enrichment score (y-axis) for KEGG terms associated with immune pathways (B), cancer-related pathways (C), and cellular adhesion pathways (D).
- (E) Enrichment scores for tumor-associated (blue) and normal tissue-associated (yellow) species across pathologic stages for selected pathways.
- (F) Panel showing enrichment scores across pathologic stage for all tumor-associated (blue) and normal tissue-associated (yellow) species and selected pathways.
- (G) Abundance of species in BC blood (green) and CRC blood (brown) samples, ordered by statistical significance.

**Figure S7. Contamination-adjusted tissue microbiome profiles for all gastrointestinal cancers in TCGA, Related to Figure 7**

- (A) Prevalence of species in blood and tissue from non-gastrointestinal cancers.
- (B) Prevalence of species in BC tissue and disease-specific tissue from non-gastrointestinal cancers.
